# Supplementary material
Source: PubMed Central journal article supplement (PMC5814575)
Supplement: NIHMS939710-supplement-Supplementary_Figures.pdf [file NIHMS939710-supplement-Supplementary_Figures.pdf]

## Supplementary Figures

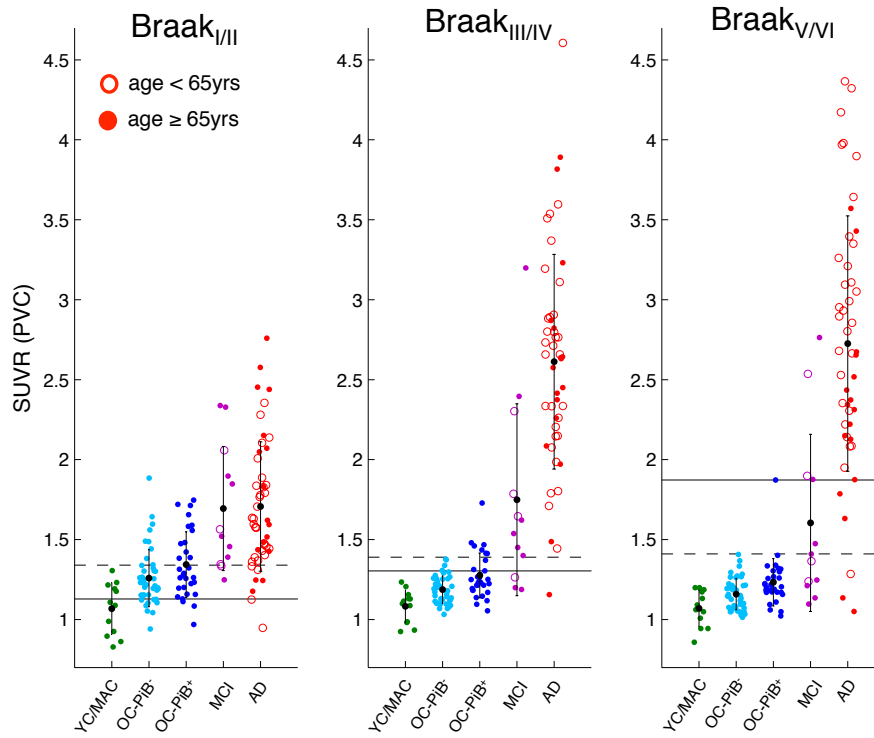

**Figure S1. Braak ROI-based AV-1451 staging for early- vs. late-onset ADs**

Tau tracer uptake (mean SUVR, PVC, individual space) for each Braak composite region of interest (ROI) by group shown for BACS controls and UCSF patients, separately for early ( $n=31$ ) and late ( $n=17$ ) onset of the disease. Mann-Whitney U tests showed that late-onset patients had significantly higher tau tracer uptake in Braak<sub>I/II</sub> ( $p=.002$ ) than early-onset patients. Black dots display mean values, error bars denote SD. Braak thresholds are shown as solid lines.

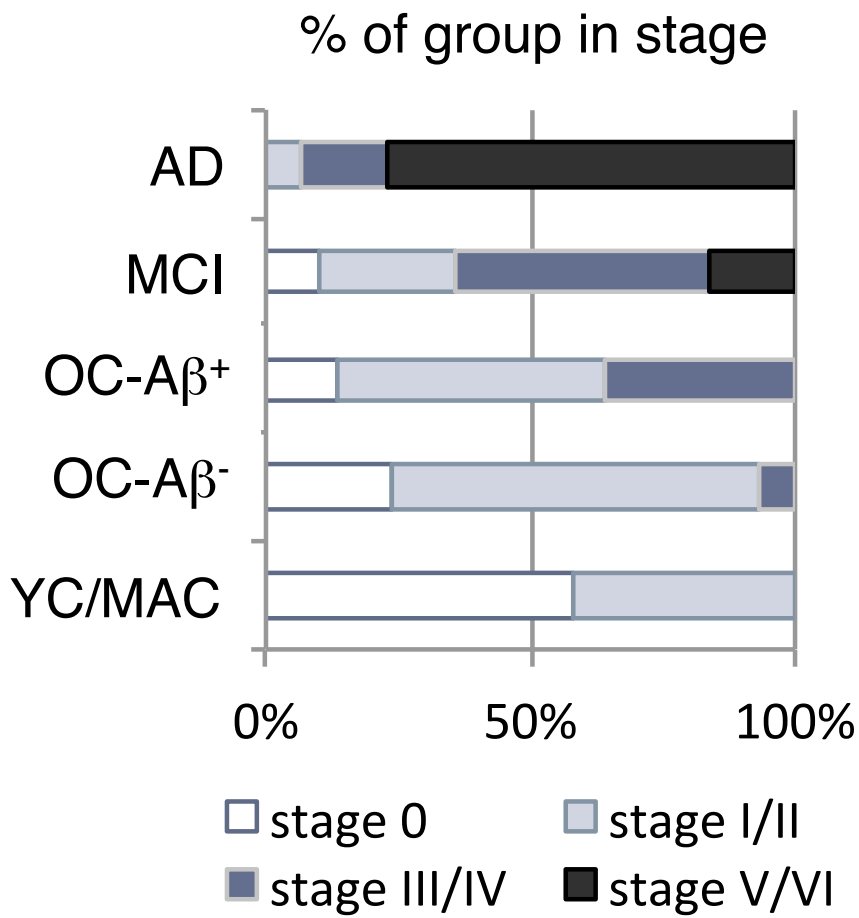

**Figure S2. Percentage of group assigned to a specific Braak ROI- based stage**

Across both samples we determined the proportion of subjects within a specific diagnostic group assigned to each stage (based on PV-corrected SUVRs).

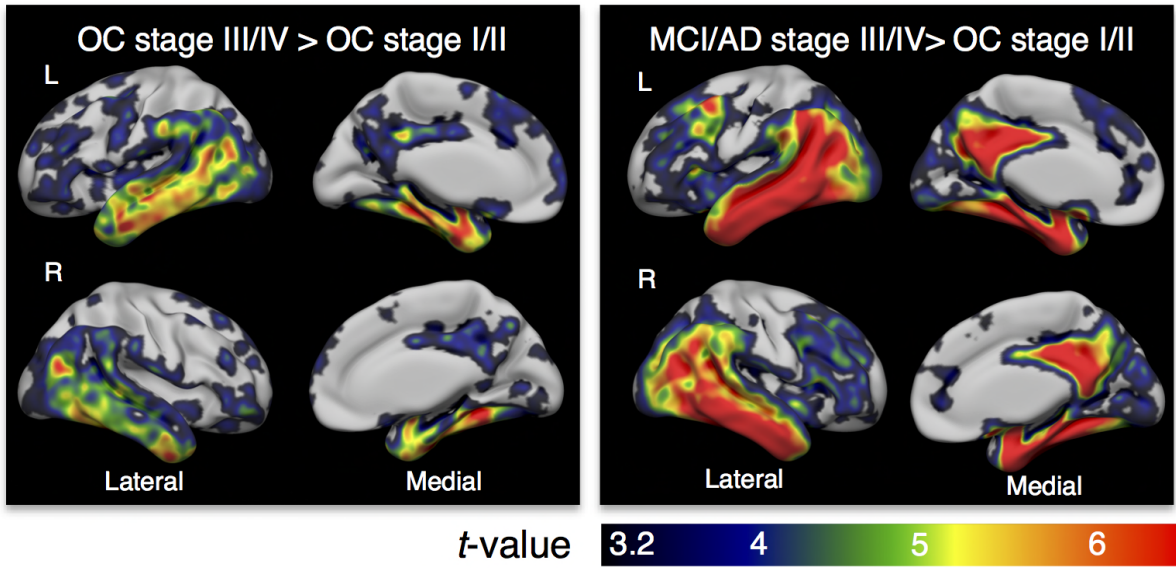

**Figure S3. Tracer uptake patterns for stage III/IV control participants and patients.**

Voxel-wise 2-sample  $t$ -tests between old controls (OC; left) or MCI/AD patients (right) assigned to stage III/IV vs. OC stage I/II.  $p_{\text{voxel}} < .001$ ,  $p_{\text{cluster}} < .05$  (cluster-based FWE corrected).

## Supplementary Files

### **File 1. Cortical mask (in MNI space) excluding basal ganglia and thalamus**

We used the Freesurfer MNI template `aparc+aseg` to create a cortical mask that includes all Braak ROIs but excludes thalamus and basal ganglia. The mask has integer values between 1-3 corresponding to 1: Braak<sub>I/II</sub>, 2: Braak<sub>III/IV</sub> and 3: Braak<sub>V/VI</sub> ROIs. We used all voxels  $> 0$  (i.e. all Braak ROIs) to derive a  $t$ -sum score as well as the percentage of supra-threshold voxels.

### **File 2. AD-vulnerable mask (in MNI space)**

We performed voxel-wise 2-sample  $t$ -tests between AD/MCI patients (all  $A\beta^+$ ) vs.  $A\beta^-$  old controls in both samples (BACS/UCSF and ADNI) and used the overlap of significant voxels to create an AD-signature mask ( $p_{cluster} < .05$ ,  $p_{voxel} < .001 \sim T > 3.2$ ).
